# Supplementary material for: Reliable Noninvasive Methods for Assessing Nutritional Status and Basal energy Expenditure(BEE) in MHD Patients: Focus on BEE
Source: Research Square preprint supplement (doi:10.21203/rs.3.rs-8592148/v1), 2026-01-27
Supplement: Supplementary file 1 [file 24cc063018a6a0b35b517aec.pdf]

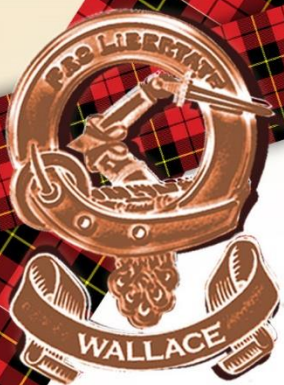

# Wallace Academic Editing

## English Editing Certificate

This certifies that the paper **Reliable Noninvasive Methods for Assessing Nutritional Status and Resting Energy Expenditure in Maintenance Hemodialysis Patients: Focus on Resting Energy Expenditure** has been edited by Jane Nicholson on December 6, 2021 and is considered to be improved in grammar, punctuation, spelling, verb usage, sentence structure, conciseness, general readability, writing style, and native English usage to the best of the editor's ability.



*Jane Nicholson*

Best regards,  
Wallace Academic Editing

Phone No.: +886-2-2555-5830

Website: <http://www.editing.tw>

Email: [editing@editing.tw](mailto:editing@editing.tw)

Address: 3F., No.180, Chang'an W. Rd., Datong Dist., Taipei City
