# Supplementary material for: Reliable Noninvasive Methods for Assessing Nutritional Status and Basal energy Expenditure(BEE) in MHD Patients: Focus on BEE
Source: Research Square preprint supplement (doi:10.21203/rs.3.rs-8592148/v1), 2026-01-27
Supplement: Supplementary file 2 [file 76f32ff5818a78be798379ab.pdf]

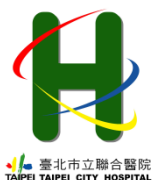

臺北市立聯合醫院人體研究倫理審查委員會  
Taipei City Hospital Research Ethics Committee  
計畫執行許可書

民國 109 年 07 月 20 日  
聯絡人：黃鈺娟  
電話：(02)27093600 分機 3802  
傳真：(02)27079021

案件編號：TCHIRB-10907008-E

計畫名稱：研究慢性洗腎病人之營養狀態和基礎代謝率評估之不侵犯性及可靠性之方法

計畫主持人：王震宇（忠孝院區）

計畫期間為民國 109 年 06 月 01 日起至民國 110 年 05 月 31 日

上述計畫業經本院 109 年度第 8 次人體研究倫理審查委員會會議審查(追認核備)，民國 109 年 07 月 18 日審查通過，特此證明。

本許可書之有效期限為民國 109 年 07 月 18 日起至民國 110 年 05 月 31 日止。

※追認核備之案件，若會議有疑義時，本會有權撤銷此計畫執行許可書。

※未完成期中報告或結案報告者不得申請新案。

※請於計畫執行許可書有效期限到期前一個月內繳交期中報告。

※請於計畫執行許可書到期前繳交結案報告。

※計畫內容若有任何修改或增減，計畫主持人或計畫委託單位需於許可書有效期限到期日 6 週前檢送修正案至本會，經審查通過後方可實施。

本次通過相關文件/版本：

中文計畫書摘要表 版本/日期：version 1/108/10-29

計畫書 版本/日期：Ver1.0/108-20-29

同意書 版本/日期：免受試者同意書

個案報告表 版本/日期：Ver 1/109/10/29

楊文理

楊文理

臺北市立聯合醫院人體研究倫理審查委員會主任委員

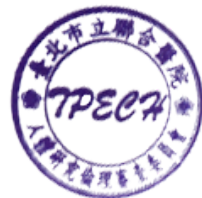

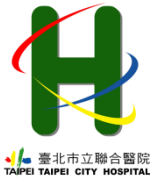

# TAIPEI CITY HOSPITAL RESEARCH ETHICS COMMITTEE

## CERTIFICATE

Date : Jul 20, 2020

The project entitled “A Study of the Non-invasive and Reliable Methods of Nutritional Status and Basal Metabolic Rate Assessment in Maintenance Hemodialysis Patients” submitted by investigator Jenn Yeu Wang has been approved by Taipei City Hospital Research Ethics Committee.

Study period: since Jun 01, 2020 to May 31, 2021

Above project is approved by the TCHREC on Jul 18, 2020 and valid till May 31, 2021.

- ※ All protocols should be subject to final endorsement by the board. TCHREC has the right to revoke the approval.
  - ※ No new protocol can be applied if the midterm report or the final report is not handed in.
  - ※ The midterm report should be handed in one month before the expiry date of this certificate.
  - ※ The final report should be handed in before the expiry date of this certificate or project end.
- The PI should send the amendments to TCHREC at least six weeks before the expiry date of this certificate if there are changes or modification related the protocol. Any change should not be executed until being approved by TCHREC.

Listed below are the documents approved:

Chinese synopsis Version / Date: version 1/108/10-29

Protocol Version / Date: Ver1.0/108-20-29

ICF Version/Date: Exemption of ICF

Case report form Version / Date: Ver 1/109/10/29

---

Winnie Yang  
Chairman  
Taipei City Hospital Research Ethics Committee

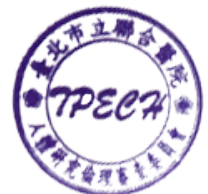

The committee is organized and operates in accordance with ICH-GCP regulations and guideline.  
本委員會組織與運作皆遵守 ICH-GCP 規定
