# Supplementary material for: Reliable Noninvasive Methods for Assessing Nutritional Status and Basal energy Expenditure(BEE) in MHD Patients: Focus on BEE
Source: Research Square preprint supplement (doi:10.21203/rs.3.rs-8592148/v1), 2026-01-27
Supplement: Supplementary file 3 [file f6089039bfa08a08479485b4.pdf]

Graphic abstract -mechanisms of increased basal energy expenditure during and immediately after hemodialysis justification of prescription of low temperature hemodialysis for hemodynamic stability -

**Loss of amino acids in to dialysate** – activation of muscle proteolysis

**Volume theory**-increased cardiac output and activation of sympathetic system due to hypovolemia

**Microinflammation theory**- muscle proteolysis caused by cytokines due to dialyzer bio-incompatibility and dialysate endotoxin

**Hormone theory**—activation of stress hormone, such as cortisol resulting in protein catabolism, glucagon and catecholamines

**Increased non-esterified fatty acids (NEFA)**-- due to heparin anticoagulation and loss of glucose into dialysate and then oxidation of NEFA

Increased basal energy expenditure

**Volume theory**- compensated vasoconstriction of skin vessels due to hypovolemia by ultrafiltration
